# Supplementary material
Source: Royal Society of Chemistry journal article supplement (doi:10.1039/d6lc00021e)
Supplement: d6lc00021e1.pdf [file d6lc00021e1.pdf]

## LEGO-Inspired Electrically-Actuated Microfluidics for On-Chip Protein Crystallization and *In-Situ* X-ray Crystallography

Sarthak Saha,<sup>1,†</sup> Logan Chen,<sup>1,†</sup> Gabrielle R. Budziszewski,<sup>2,3</sup> Sara Koprek,<sup>1</sup> Kaleb Seifert,<sup>4</sup> Aina Cohen,<sup>5</sup> Silvia Russi,<sup>5</sup> Sarah E.J. Bowman,<sup>2,3</sup> Sarah L. Perry<sup>1,\*</sup>

<sup>1</sup> Department of Chemical and Biomolecular Engineering, University of Massachusetts Amherst, Amherst, MA 01003, USA

<sup>2</sup> Department of Biochemistry, Jacobs School of Medicine and Biomedical Sciences at The State University at Buffalo, Buffalo, NY 14023, USA

<sup>3</sup> University at Buffalo Hauptman Woodward Research Institute, Buffalo, NY, 14203, USA

<sup>4</sup> Department of Biomedical Engineering, University of Massachusetts Amherst, Amherst, MA 01003, USA

<sup>5</sup> SLAC National Accelerator Laboratory, Menlo Park, CA 94025, USA

† Authors contributed equally

\* Correspondence email: [perrys@engin.umass.edu](mailto:perrys@engin.umass.edu)

**Table S1.** Crystallographic statistics for data obtained at room temperature for Rubrerythrin grown in LEAP-X and traditional vapour diffusion.

|                                         | Rubrerythrin<br>(LEAP-X, merged from<br>two crystal) | Rubrerythrin<br>(Vapour Diffusion<br>harvested, Single crystal) |
|-----------------------------------------|------------------------------------------------------|-----------------------------------------------------------------|
| Data collection                         |                                                      |                                                                 |
| Space group                             | R3<br>PDB 9P19                                       | R3<br>PDB 9P1A                                                  |
| Cell dimensions                         |                                                      |                                                                 |
| a, b, c (Å)                             | 203.4, 203.4, 71.08                                  | 203.36, 203.36, 69.87                                           |
| $\alpha, \beta, \gamma$ (°)             | 90, 90, 120                                          | 90, 90, 120                                                     |
| Resolution (Å)                          | 30.15-1.96<br>(1.99-1.96)                            | 29.35-1.93<br>(1.97-1.93)                                       |
| $R_{\text{meas}}$                       | 0.12 (1.4)                                           | 0.26 (4.3)                                                      |
| Mean $I/\sigma I$                       | 5.8 (0.4)                                            | 5.2 (0.6)                                                       |
| Completeness (%)                        | 95.8 (94.5)                                          | 100.0 (100.0)                                                   |
| $CC_{1/2}$                              | 0.945 (0.257)                                        | 0.990 (0.197)                                                   |
| $CC^*$                                  | 0.986 (0.639)                                        | 0.997 (0.574)                                                   |
| Refinement                              |                                                      |                                                                 |
| Resolution (Å)                          | 30.15-1.96                                           | 29.35-1.93                                                      |
| Unique reflections                      | 12677                                                | 154394                                                          |
| $R_{\text{work}} / R_{\text{free}}$ (%) | 16.67/21.27                                          | 18.50/22.27                                                     |
| Ramachadran plot                        |                                                      |                                                                 |
| In preferred regions (%)                | 97.57                                                | 97.32                                                           |
| Outliers (%)                            | 0.00                                                 | 0.00                                                            |
| r.m.s. deviations                       |                                                      |                                                                 |
| Bond lengths (Å)                        | 0.01                                                 | 0.01                                                            |
| Bond angles (°)                         | 0.976                                                | 1.032                                                           |

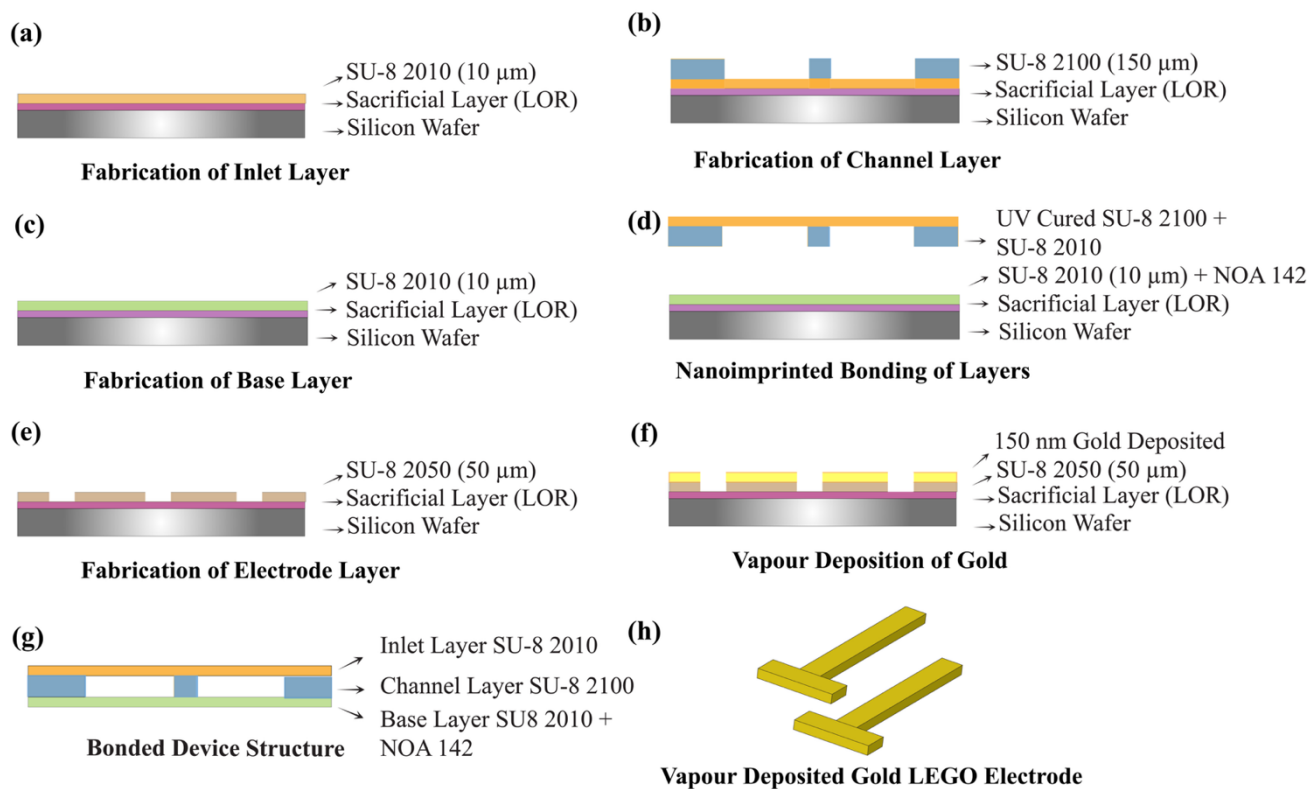

**Figure S1.** Schematic **(a)-(d)** showing step-by-step fabrication of LEAP-X using photolithography and nanoimprinting and **(e)-(f)** showing the fabrication of gold LEGO electrode (GLE), **(g)** side view of the bonded device and **(h)** schematic of the GLE.

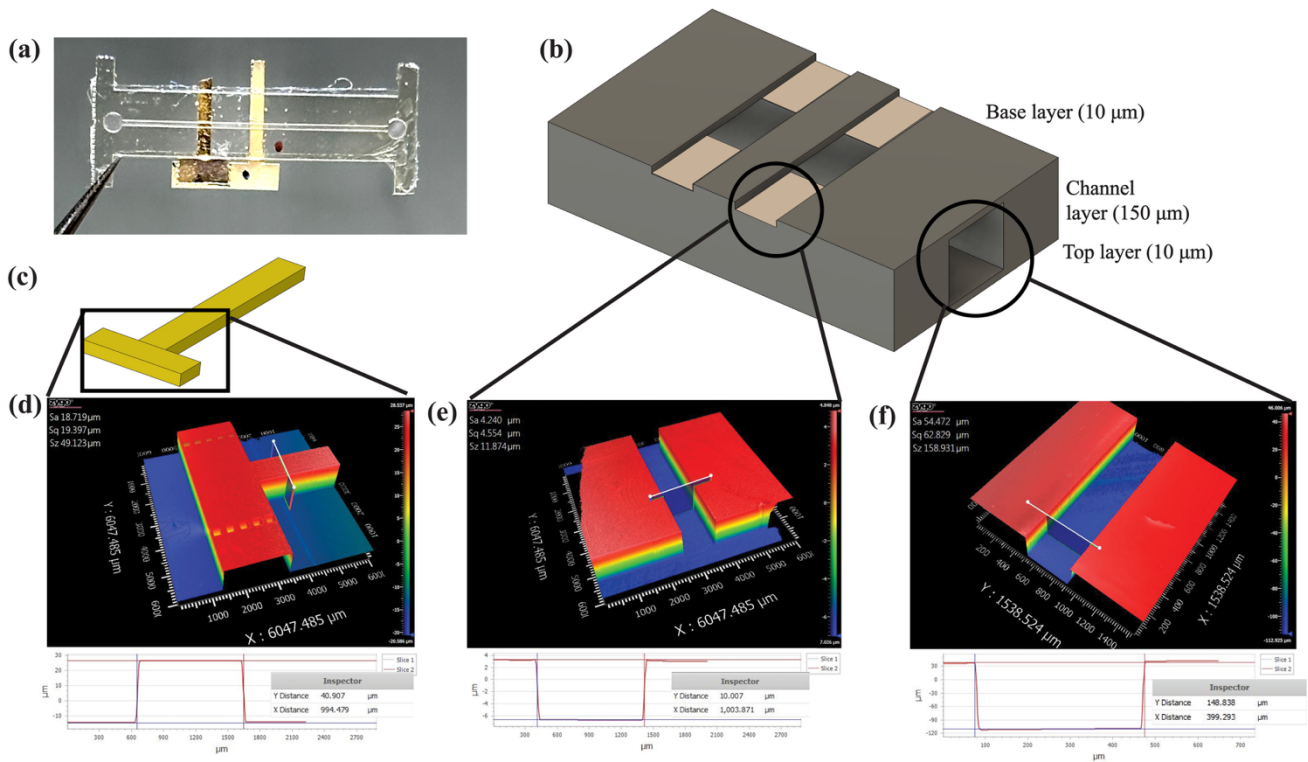

**Figure S2.** (a) Optical micrographs of the assembled LEAP-X (b) 3D model of the valving area; and (c) gold electrodes. Panels (d–f) show optical profilometry data (3D images and 2D cross-sections) of the electrode, the electrode gaps in the bottom layer, and the open channel depth prior to nanoimprinting, respectively.

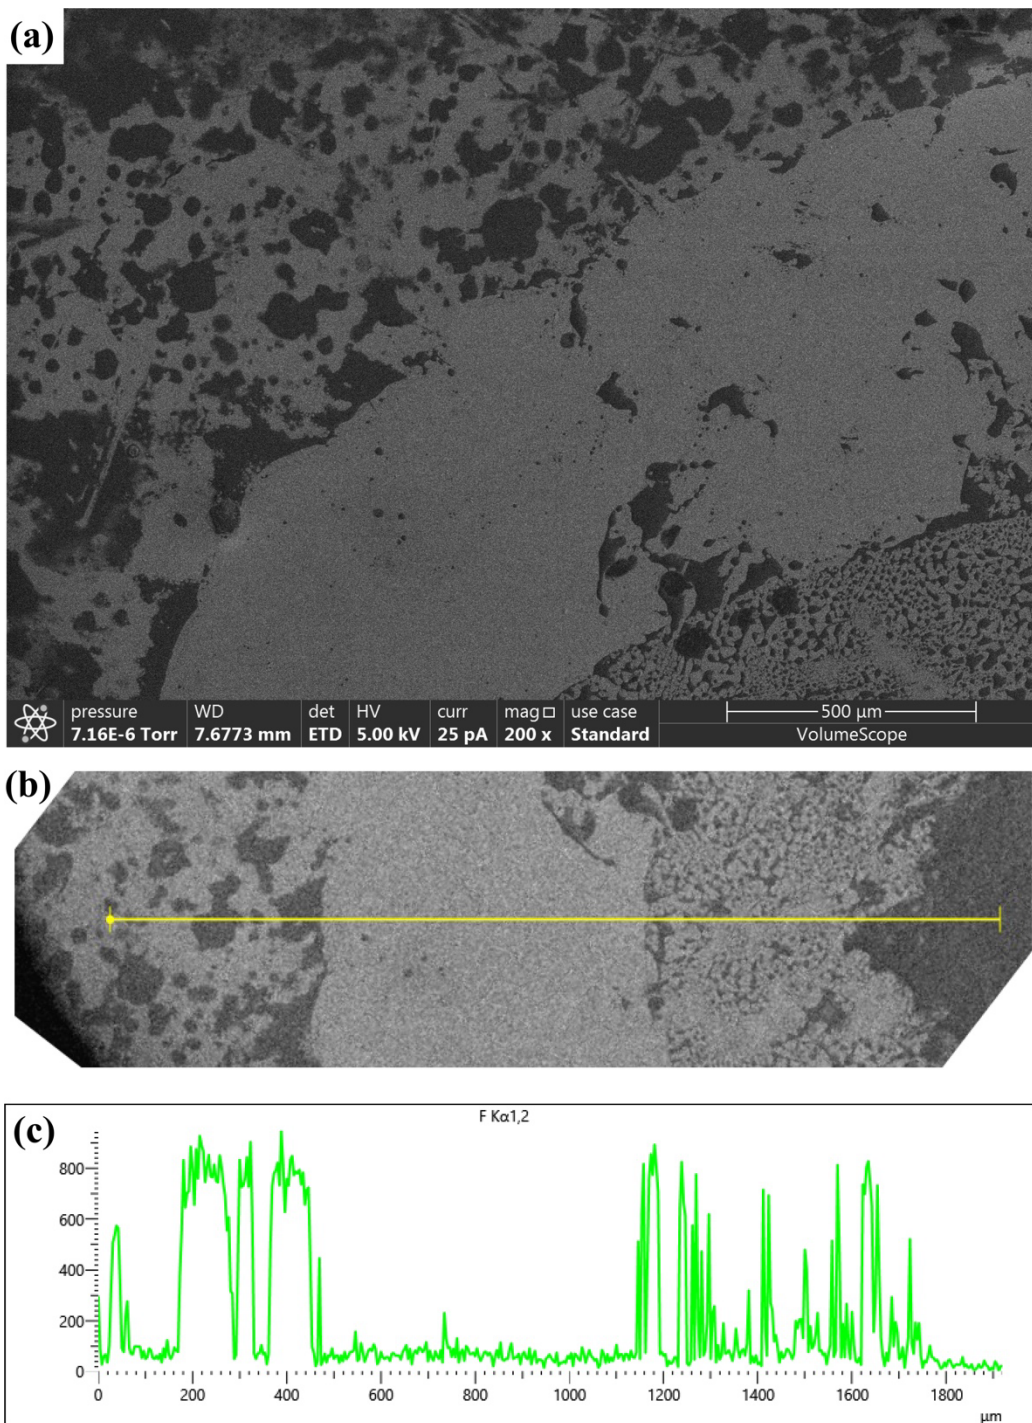

**Figure S3.** (a) Scanning electron micrograph of the silane deposited gold electrode showing the removal of silane in a coffee ring manner. (b) A line trace of the same image and (c) the corresponding fluorine signal from energy dispersive X-ray spectroscopy (EDS).

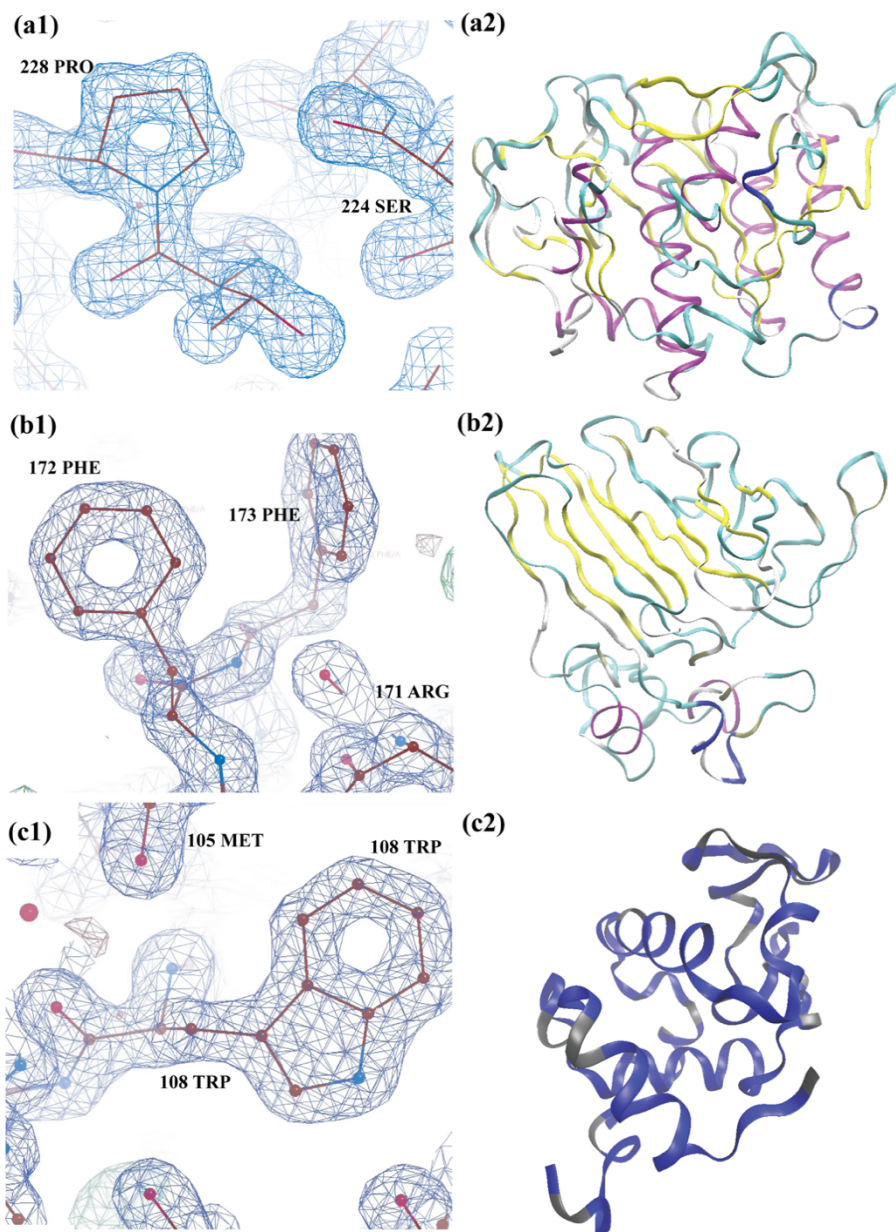

**Figure S4.** The representative 2Fo-Fc map contoured at  $\sigma = 1.1$  and the corresponding structure of (a) proteinase K, (b) thaumatin, and (c) lysozyme.

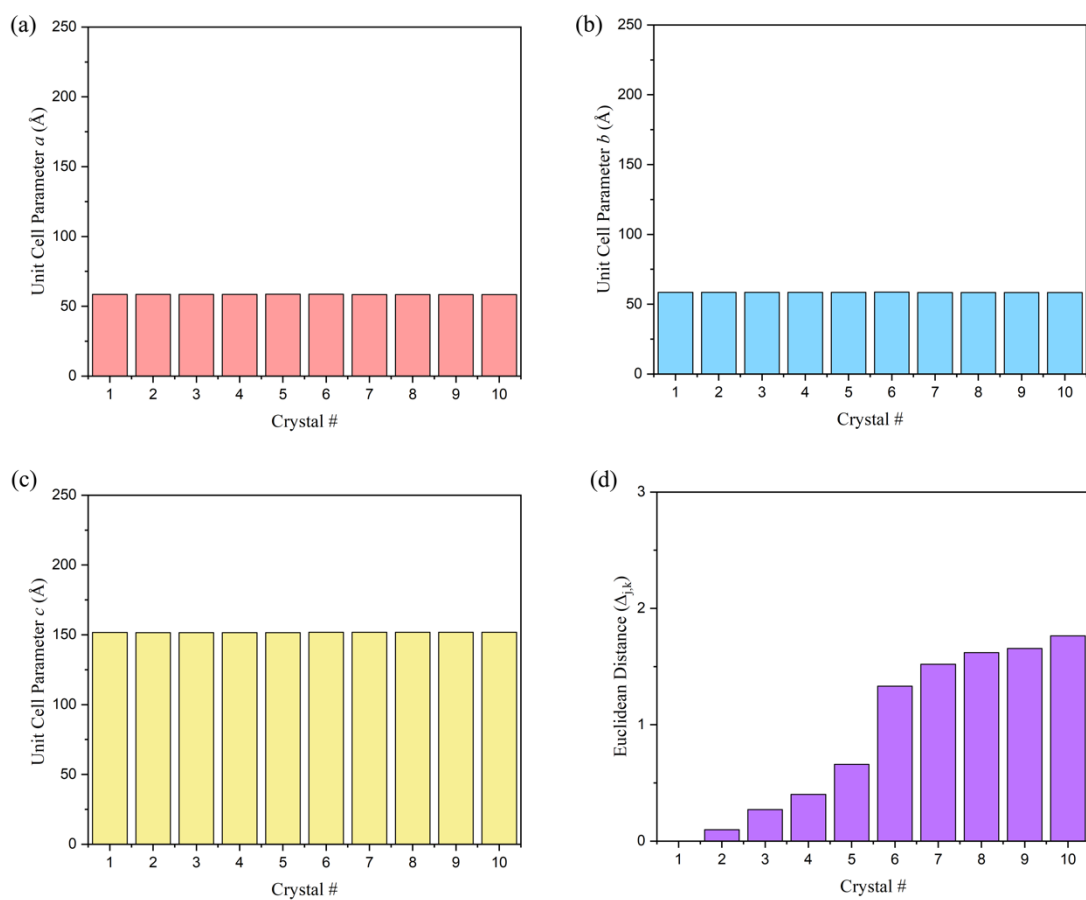

**Figure S5.** (a)-(c) Plot of the variation in the corresponding unit cell parameter across the 10 crystals of thaumatin analyzed, and (d) a plot of the standard Euclidean distance  $\Delta_{j,k}$  vs. crystal, showing the variation in the unit cell parameters.

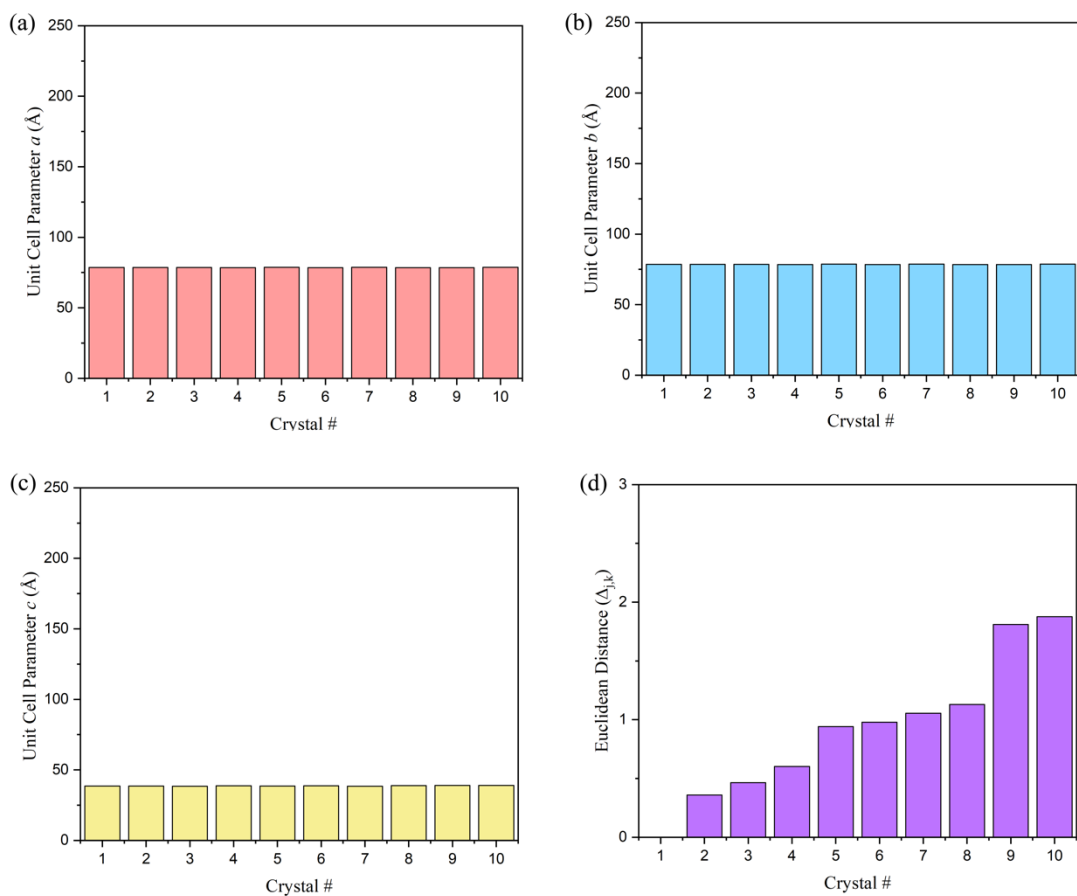

**Figure S6.** (a)-(c) Plot of the variation in the corresponding unit cell parameter across the 10 crystals of lysozyme analyzed, and (d) a plot of the standard Euclidean distance  $\Delta_{j,k}$  vs. crystal, showing the variation in the unit cell parameters.

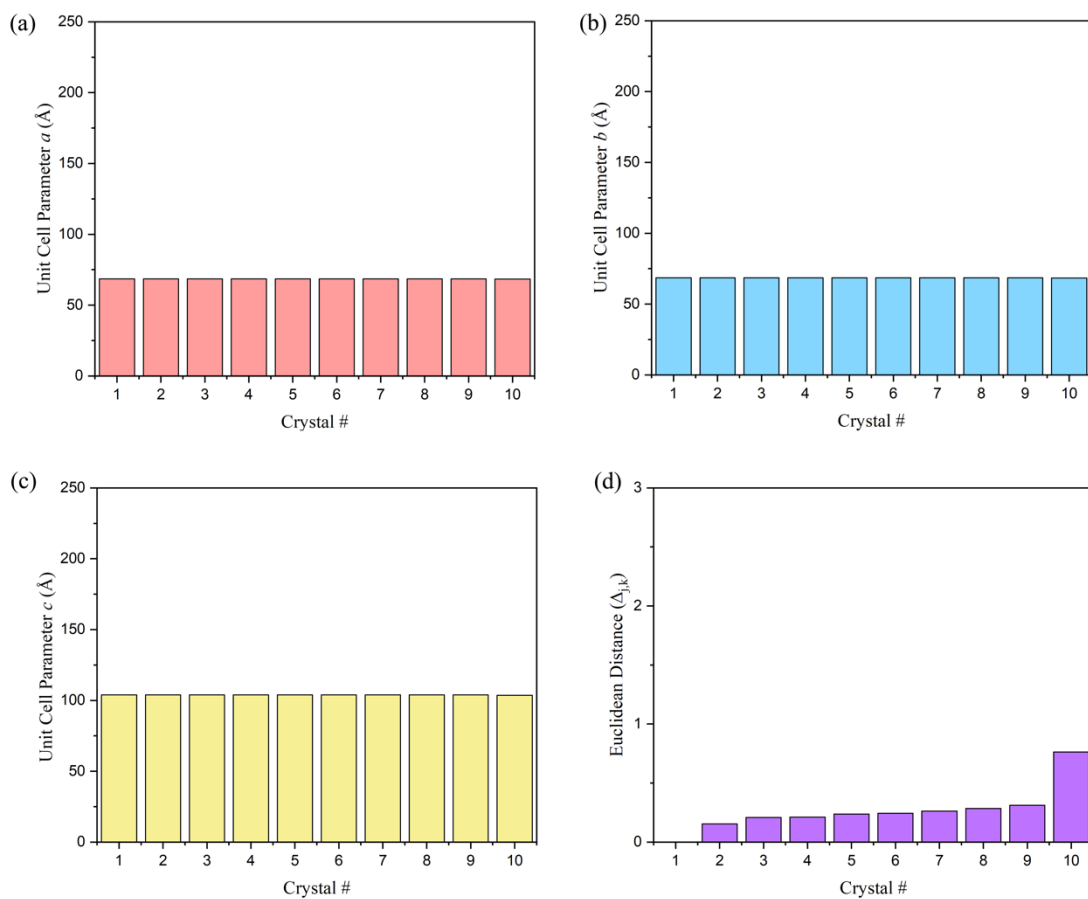

**Figure S7.** (a)-(c) Plot of the variation in the corresponding unit cell parameter across the 10 crystals of proteinase K analyzed, and (d) a plot of the standard Euclidean distance  $\Delta_{j,k}$  vs. crystal, showing the variation in the unit cell parameters.

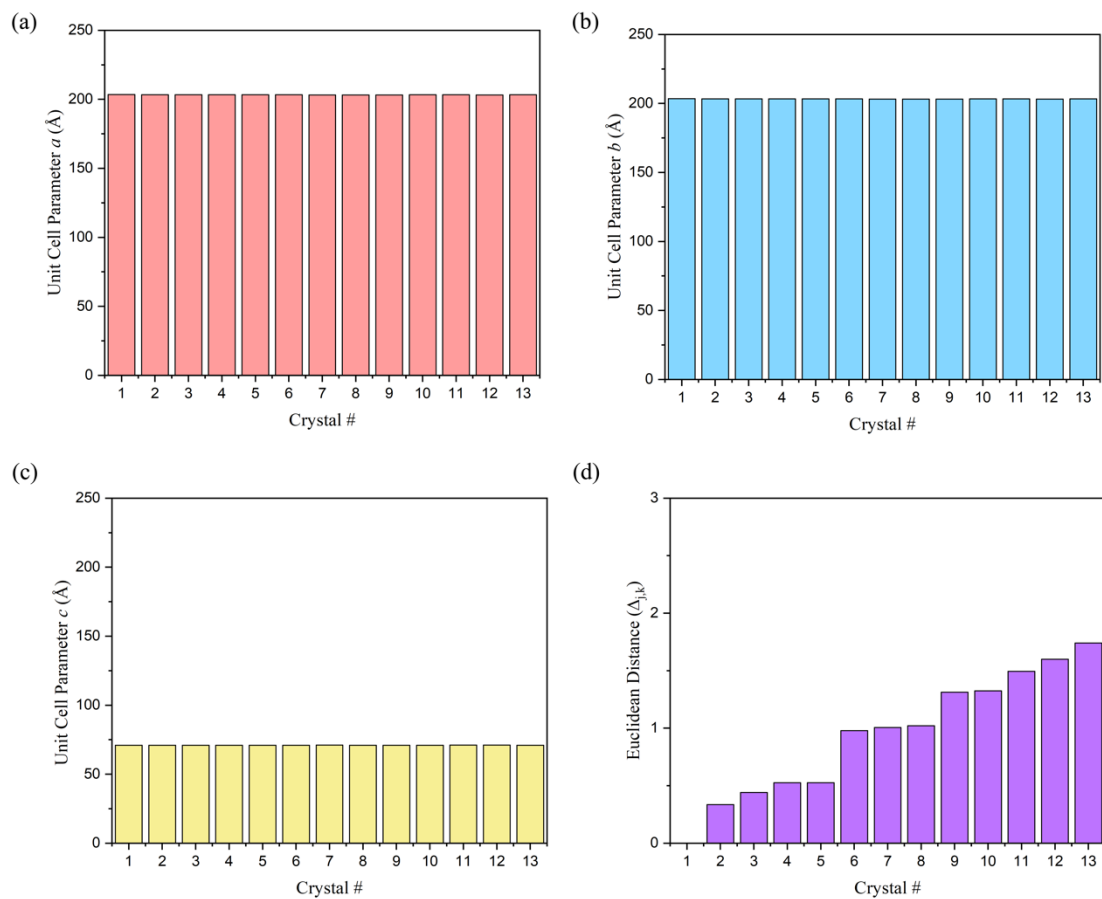

**Figure S8.** (a)-(c) Plot of the variation in the corresponding unit cell parameter across the 13 crystals of rubrerythrin analyzed, and (d) a plot of the standard Euclidean distance  $\Delta_{j,k}$  vs. crystal, showing the variation in the unit cell parameters.
